# Supplementary material for: Extracts and Residues of Common Ragweed (Ambrosia artemisiifolia L.) Cause Alterations in Root and Shoot Growth of Crops
Source: MDPI journal article supplement (doi:10.3390/plants12091768), 2023-04-26
Supplement: s1 [file s1]

**Table S1:** 20 Most abundant chemical constituents of the essential oil of ragweed

| Compound                          | Classification | Percentage of total |
|-----------------------------------|----------------|---------------------|
| Germacrene D                      | sesquiterpene  | 48.9 %              |
| Germacrene B                      | sesquiterpene  | 7.8 %               |
| $\beta$ -Caryophyllene            | sesquiterpene  | 3.8 %               |
| $\beta$ -Myrcene                  | terpene        | 3.7 %               |
| Ocimene                           | monoterpene    | 3.7 %               |
| Phytol                            | diterpene      | 3.3 %               |
| D-Limonene                        | monoterpene    | 2.5 %               |
| Borneol                           | monoterpene    | 2.0 %               |
| cis-Lanceol                       | sesquiterpene  | 1.7 %               |
| Naphtalene ( $\gamma$ -Muurolene) | terpene        | 1.6 %               |
| $\alpha$ -Caryophyllene           | sesquiterpene  | 1.6 %               |
| $\alpha$ -Bergamotene             | sesquiterpene  | 1.6 %               |
| $\beta$ -Elemene                  | monoterpene    | 1.3 %               |
| $\beta$ -Panasinsene              | sesquiterpene  | 1.1 %               |
| 1S- $\alpha$ -Pinene              | monoterpene    | 1.1 %               |
| Guaiol                            | sesquiterpene  | 1.0 %               |
| $\beta$ -Pinene                   | monoterpene    | 0.9 %               |
| $\Delta$ -Elemene                 | monoterpene    | 0.9 %               |
| $\Delta$ -Cadinene                | sesquiterpene  | 0.9 %               |
| $\beta$ -Selinene                 | sesquiterpene  | 0.8 %               |

**Table S2:** Chemical constituents of the aqueous extracts (shoot and root) of f ragweed

| Substance                                                       | Substance type        |
|-----------------------------------------------------------------|-----------------------|
| (4-Aminobutyl)guanidine                                         | amino compound        |
| Ambrosic acid                                                   | oxane                 |
| 6,15-Dihydroxy-1(10),4,11(13)-germacatrien-12,8-olide           | germacranolide        |
| Artemisinin                                                     | sesquiterpene lactone |
| 1,4-Dihydroxy-11(13)-pseudoguaian-12,6-olide                    | sesquiterpene lactone |
| 1,8-Dihydroxy-5-oxo-4(15),10(14),11(13)-germacatrien-12,6-olide | germacranolide        |
| Psilostachyin                                                   | sesquiterpene lactone |
| Isabelin                                                        | sesquiterpene lactone |
| 4-Oxo-3,4-secoambrosan-12,6-olid-3-oic acid                     | sesquiterpene lactone |
| 5,6-Dihydroxy-4(15),11(13)-germacradien-12,8-olid-14-oic acid   | germacranolide        |
| 6,15-Dihydroxy-4,11(13)-germacradien-12,8-olid-14-oic acid      | germacranolide        |
| 3,4-Dihydroxy-11(13)-pseudoguaian-12,6-olide                    | $\gamma$ -lactone     |
| 4(15)-Eudesmene-1,6-diol                                        | sesquiterpenoid       |
| 5,8,9,10-Daucanetetrol                                          | hydroxy steroid       |
| 9-Hydroxy-4-guaian-12,6-olide                                   | sesquiterpene lactone |
| 4,9-Dihydroxy-10(14),11(13)-guaiadien-12-oic acid               | sesquiterpenoid       |
| 4(15)-Eudesmene-1,6-diol;                                       | sesquiterpenoid       |

**Table S3:** Germination rate (%) and root length (cm) of soybean, wheat, maize, and ragweed (mean  $\pm$  standard deviation) seven days after seeding; germination rate: n = 100; root length: n = 25; significance levels: n.s. = not significant, \* p < 0.05, \*\* p < 0.01, \*\*\* p < 0.001 refer to the untreated control

|                      |                | Shoot extract (ST)     |                        |                        | Root extract (RT)     |                        |                       | Essential Oil (EO)   |                       | Residues (Resi)        |                        |                        |
|----------------------|----------------|------------------------|------------------------|------------------------|-----------------------|------------------------|-----------------------|----------------------|-----------------------|------------------------|------------------------|------------------------|
|                      | Control        | 1%                     | 10%                    | 100%                   | 1%                    | 10%                    | 100%                  | 0.5 %                | 1%                    | 1%                     | 5%                     | 10%                    |
| <b>Soybean</b>       |                |                        |                        |                        |                       |                        |                       |                      |                       |                        |                        |                        |
| Germination rate (%) | 94             | 87                     | 88                     | 75                     | 88                    | 82                     | 87                    | 77                   | 82                    | 98                     | 94                     | 94                     |
| Root length (cm)     | 5.7 $\pm$ 1.3  | 2.7 $\pm$ 0.9<br>***   | 2.6 $\pm$ 0.9<br>***   | 2.5 $\pm$ 0.8<br>***   | 4.3 $\pm$ 1.1<br>**   | 2.3 $\pm$ 0.7<br>***   | 2.8 $\pm$ 1.4<br>***  | 4.7 $\pm$ 1.1<br>**  | 4.5 $\pm$ 0.9<br>***  | 6.0 $\pm$ 1.9<br>n.s.  | 5.6 $\pm$ 1.6<br>n.s.  | 5.2 $\pm$ 1.3<br>n.s.  |
| <b>Wheat</b>         |                |                        |                        |                        |                       |                        |                       |                      |                       |                        |                        |                        |
| Germination rate (%) | 100            | 99                     | 92                     | 93                     | 89                    | 97                     | 97                    | 96                   | 99                    | 98                     | 97                     | 98                     |
| Root length (cm)     | 10.3 $\pm$ 0.8 | 9.7 $\pm$ 0.9<br>n.s.  | 8.5 $\pm$ 1.8<br>***   | 4.1 $\pm$ 1.4<br>***   | 7.4 $\pm$ 1.2<br>***  | 6.2 $\pm$ 1.4<br>***   | 5.4 $\pm$ 1.3<br>***  | 5.1 $\pm$ 1.3<br>*** | 2.6 $\pm$ 0.9<br>***  | 10.7 $\pm$ 1.4<br>n.s. | 8.6 $\pm$ 1.0<br>*     | 6.1 $\pm$ 1.3<br>***   |
| <b>Maize</b>         |                |                        |                        |                        |                       |                        |                       |                      |                       |                        |                        |                        |
| Germination rate (%) | 98             | 84                     | 88                     | 83                     | 82                    | 88                     | 92                    | 84                   | 86                    | 92                     | 91                     | 92                     |
| Root length (cm)     | 11.4 $\pm$ 1.9 | 10.9 $\pm$ 2.1<br>n.s. | 7.6 $\pm$ 2.1<br>***   | 6.7 $\pm$ 3.3<br>***   | 9.8 $\pm$ 3.2<br>n.s. | 10.9 $\pm$ 4.1<br>n.s. | 8.7 $\pm$ 2.7<br>n.s. | 4.3 $\pm$ 1.8<br>*** | 8.1 $\pm$ 2.5<br>***  | 9.8 $\pm$ 2.6<br>n.s.  | 10.5 $\pm$ 2.3<br>n.s. | 10.2 $\pm$ 2.8<br>n.s. |
| <b>Ragweed</b>       |                |                        |                        |                        |                       |                        |                       |                      |                       |                        |                        |                        |
| Germination rate (%) | 80             | 72                     | 78                     | 74                     | 49                    | 46                     | 47                    | 74                   | 75                    | 73                     | 76                     | 55                     |
| Root length (cm)     | 9.7 $\pm$ 5.0  | 12.4 $\pm$ 3.2<br>n.s. | 15.9 $\pm$ 9.6<br>n.s. | 10.0 $\pm$ 6.4<br>n.s. | 6.8 $\pm$ 1.9<br>n.s. | 6.2 $\pm$ 2.3<br>n.s.  | 6.1 $\pm$ 2.1<br>n.s. | 5.5 $\pm$ 3.8<br>**  | 6.3 $\pm$ 4.0<br>n.s. | 4.9 $\pm$ 1.5<br>*     | 4.8 $\pm$ 0.7<br>**    | 3.3 $\pm$ 1.1<br>***   |

**Table S4:** Aboveground dry matter (mg) and root mass (mg) of soybean, wheat, maize, and ragweed in dependency of the treatment (ST, RT, EO, and Resi) and the concentration of the treatment 7, 10, and 24 days after seeding (DAS), (mean  $\pm$  standard deviation); n = 10; significance levels: n.s. = not significant, \* p < 0.05, \*\* p < 0.01, \*\*\* p < 0.001 refer to the untreated control

| Aboveground dry matter (mg) |           |                    |      |          |      |          |      |                   |      |          |      |          |      |                    |      |          |      |                 |      |           |      |           |      |
|-----------------------------|-----------|--------------------|------|----------|------|----------|------|-------------------|------|----------|------|----------|------|--------------------|------|----------|------|-----------------|------|-----------|------|-----------|------|
|                             | Control   | Shoot extract (ST) |      |          |      |          |      | Root extract (RT) |      |          |      |          |      | Essential Oil (EO) |      |          |      | Residues (Resi) |      |           |      |           |      |
|                             |           | 1 %                |      | 10 %     |      | 100 %    |      | 1 %               |      | 10 %     |      | 100 %    |      | 0.5 %              |      | 1 %      |      | 1 %             |      | 5 %       |      | 10 %      |      |
| Soybean                     |           |                    |      |          |      |          |      |                   |      |          |      |          |      |                    |      |          |      |                 |      |           |      |           |      |
| 10 DAS                      | 139 ± 19  | 195 ± 28           | ***  | 167 ± 27 | n.s. | 172 ± 44 | n.s. | 195 ± 22          | ***  | 195 ± 26 | ***  | 174 ± 22 | n.s. | 181 ± 20           | **   | 142 ± 37 | n.s. | 137 ± 48        | n.s. | 149 ± 59  | n.s. | 136 ± 121 | n.s. |
| 17 DAS                      | 161 ± 33  | 179 ± 14           | n.s. | 165 ± 13 | n.s. | 182 ± 23 | n.s. | 149 ± 41          | n.s. | 175 ± 35 | n.s. | 171 ± 42 | n.s. | 144 ± 31           | n.s. | 121 ± 43 | n.s. | 159 ± 27        | n.s. | 163 ± 34  | n.s. | 139 ± 74  | n.s. |
| 24 DAS                      | 241 ± 32  | 202 ± 24           | n.s. | 129 ± 68 | ***  | 121 ± 66 | ***  | 168 ± 90          | n.s. | 85 ± 68  | ***  | 110 ± 63 | ***  | 131 ± 82           | **   | 87 ± 78  | ***  | 118 ± 64        | ***  | 128 ± 71  | **   | 81 ± 74   | ***  |
| Wheat                       |           |                    |      |          |      |          |      |                   |      |          |      |          |      |                    |      |          |      |                 |      |           |      |           |      |
| 10 DAS                      | 20 ± 13   | 30 ± 7 a           | n.s. | 18 ± 5 a | n.s. | 23 ± 8 b | n.s. | 22 ± 8            | n.s. | 21 ± 7   | n.s. | 24 ± 8   | n.s. | 11 ± 9             | n.s. | 8 ± 10   | *    | 24 ± 6          | n.s. | 14 ± 12   | n.s. | 15 ± 7    | n.s. |
| 17 DAS                      | 29 ± 4    | 28 ± 6             | n.s. | 35 ± 6   | n.s. | 51 ± 2   | ***  | 35 ± 18           | n.s. | 32 ± 7   | n.s. | 30 ± 14  | n.s. | 27 ± 9             | n.s. | 16 ± 8   | ***  | 29 ± 7          | n.s. | 27 ± 7    | n.s. | 25 ± 19   | n.s. |
| 24 DAS                      | 50 ± 8    | 44 ± 7             | n.s. | 46 ± 21  | n.s. | 54 ± 7   | n.s. | 43 ± 18           | n.s. | 48 ± 14  | n.s. | 55 ± 11  | n.s. | 34 ± 19            | n.s. | 12 ± 11  | ***  | 47 ± 15         | n.s. | 48 ± 26   | n.s. | 34 ± 19   | **   |
| Maize                       |           |                    |      |          |      |          |      |                   |      |          |      |          |      |                    |      |          |      |                 |      |           |      |           |      |
| 10 DAS                      | 71 ± 11   | 61 ± 26            | n.s. | 71 ± 13  | n.s. | 80 ± 16  | n.s. | 61 ± 7            | n.s. | 68 ± 25  | n.s. | 48 ± 19  | **   | 60 ± 19            | n.s. | 60 ± 15  | n.s. | 60 ± 12         | n.s. | 53 ± 7    | n.s. | 33 ± 8    | ***  |
| 17 DAS                      | 116 ± 20  | 142 ± 25           | n.s. | 158 ± 46 | *    | 146 ± 52 | n.s. | 133 ± 18          | n.s. | 154 ± 23 | *    | 137 ± 45 | n.s. | 171 ± 52           | **   | 129 ± 50 | n.s. | 119 ± 18        | n.s. | 107 ± 43  | n.s. | 80 ± 35   | *    |
| 24 DAS                      | 244 ± 50  | 223 ± 40           | n.s. | 166 ± 95 | n.s. | 156 ± 89 | *    | 157 ± 16          | ***  | 187 ± 22 | n.s. | 132 ± 73 | ***  | 150 ± 51           | ***  | 187 ± 32 | **   | 157 ± 48        | ***  | 94 ± 15   | ***  | 32 ± 46   | ***  |
| Ragweed                     |           |                    |      |          |      |          |      |                   |      |          |      |          |      |                    |      |          |      |                 |      |           |      |           |      |
| 10 DAS                      | 8 ± 1     | 8 ± 4              | n.s. | 12 ± 9   | n.s. | 11 ± 4   | n.s. | 12 ± 7            | n.s. | 11 ± 5   | n.s. | 9 ± 2    | n.s. | 11 ± 6             | n.s. | 10 ± 4   | n.s. | 9 ± 5           | n.s. | 8 ± 12    | n.s. | 0 ± 0     | ***  |
| 17 DAS                      | 16 ± 5    | 12 ± 4             | n.s. | 28 ± 10  | **   | 32 ± 10  | ***  | 21 ± 14           | n.s. | 23 ± 8   | n.s. | 7 ± 5    | n.s. | 22 ± 12            | n.s. | 35 ± 16  | **   | 1 ± 1           | ***  | 1 ± 2     | **   | 0 ± 0     | ***  |
| 24 DAS                      | 19 ± 2    | 7 ± 3              | n.s. | 53 ± 20  | ***  | 58 ± 18  | ***  | 20 ± 11           | n.s. | 14 ± 12  | n.s. | 7 ± 6    | ***  | 6 ± 4              | ***  | 12 ± 9   | n.s. | 7 ± 4           | n.s. | 2 ± 2     | ***  | 2 ± 2     | ***  |
| Root mass (mg)              |           |                    |      |          |      |          |      |                   |      |          |      |          |      |                    |      |          |      |                 |      |           |      |           |      |
|                             | Control   | Shoot extract (ST) |      |          |      |          |      | Root extract (RT) |      |          |      |          |      | Essential Oil (EO) |      |          |      | Residues (Resi) |      |           |      |           |      |
|                             |           | 1 %                |      | 10 %     |      | 100 %    |      | 1 %               |      | 10 %     |      | 100 %    |      | 0.5 %              |      | 1 %      |      | 1 %             |      | 5 %       |      | 10 %      |      |
| Soybean                     |           |                    |      |          |      |          |      |                   |      |          |      |          |      |                    |      |          |      |                 |      |           |      |           |      |
| 10 DAS                      | 15 ± 3    | 13 ± 9             | n.s. | 13 ± 8   | n.s. | 10 ± 6   | n.s. | 12 ± 5            | n.s. | 7 ± 4    | n.s. | 15 ± 5   | n.s. | 17 ± 3             | n.s. | 11 ± 6   | n.s. | 14 ± 4          | n.s. | 4 ± 3     | ***  | 3 ± 2     | ***  |
| 17 DAS                      | 30 ± 4    | 37 ± 10            | n.s. | 32 ± 7   | n.s. | 19 ± 7   | *    | 29 ± 9            | n.s. | 31 ± 14  | n.s. | 25 ± 10  | n.s. | 17 ± 10            | **   | 28 ± 8   | n.s. | 24 ± 8          | ***  | 9 ± 6     | ***  | 6 ± 4     | ***  |
| 24 DAS                      | 68 ± 7    | 44 ± 16            | n.s. | 24 ± 23  | ***  | 24 ± 16  | ***  | 48 ± 26           | n.s. | 32 ± 20  | ***  | 14 ± 18  | ***  | 38 ± 24            | *    | 24 ± 30  | ***  | 15 ± 15         | **   | 6 ± 5     | ***  | 9 ± 9     | ***  |
| Wheat                       |           |                    |      |          |      |          |      |                   |      |          |      |          |      |                    |      |          |      |                 |      |           |      |           |      |
| 10 DAS                      | 10 ± 1    | 13 ± 2             | n.s. | 12 ± 3   | n.s. | 11 ± 3   | n.s. | 13 ± 2            | *    | 11 ± 3   | n.s. | 12 ± 3   | n.s. | 10 ± 6             | n.s. | 5 ± 4    | *    | 12 ± 2          | n.s. | 7 ± 5     | n.s. | 7 ± 3     | n.s. |
| 17 DAS                      | 23 ± 4    | 20 ± 3             | n.s. | 20 ± 4   | n.s. | 24 ± 4   | n.s. | 19 ± 5            | n.s. | 24 ± 5   | n.s. | 23 ± 7   | n.s. | 18 ± 6             | n.s. | 11 ± 2   | ***  | 24 ± 8          | n.s. | 15 ± 2    | n.s. | 8 ± 5     | ***  |
| 24 DAS                      | 38 ± 3    | 38 ± 4             | n.s. | 29 ± 9   | *    | 24 ± 7   | ***  | 33 ± 6            | n.s. | 30 ± 3   | **   | 27 ± 8   | ***  | 25 ± 14            | *    | 9 ± 10   | ***  | 35 ± 10         | n.s. | 18 ± 10   | ***  | 16 ± 10   | ***  |
| Maize                       |           |                    |      |          |      |          |      |                   |      |          |      |          |      |                    |      |          |      |                 |      |           |      |           |      |
| 10 DAS                      | 133 ± 27  | 117 ± 12           | n.s. | 154 ± 35 | n.s. | 159 ± 47 | n.s. | 123 ± 25          | n.s. | 143 ± 17 | n.s. | 125 ± 28 | n.s. | 161 ± 63           | n.s. | 145 ± 28 | n.s. | 129 ± 20        | n.s. | 136 ± 7   | n.s. | 142 ± 40  | n.s. |
| 17 DAS                      | 141 ± 38  | 120 ± 40           | n.s. | 154 ± 23 | n.s. | 170 ± 33 | n.s. | 137 ± 27          | n.s. | 146 ± 36 | n.s. | 160 ± 32 | n.s. | 188 ± 41           | **   | 154 ± 24 | n.s. | 162 ± 46        | n.s. | 167 ± 23  | n.s. | 159 ± 29  | n.s. |
| 24 DAS                      | 153 ± 19  | 176 ± 48           | n.s. | 228 ± 53 | **   | 151 ± 81 | n.s. | 128 ± 36          | n.s. | 110 ± 63 | n.s. | 142 ± 84 | n.s. | 182 ± 36           | n.s. | 152 ± 36 | n.s. | 166 ± 62        | n.s. | 110 ± 18  | *    | 101 ± 63  | **   |
| Ragweed                     |           |                    |      |          |      |          |      |                   |      |          |      |          |      |                    |      |          |      |                 |      |           |      |           |      |
| 10 DAS                      | 0.6 ± 0.3 | 2 ± 1              | n.s. | 3 ± 2    | n.s. | 3 ± 3    | n.s. | 3 ± 2             | *    | 2 ± 2    | n.s. | 1 ± 1    | n.s. | 3 ± 1              | n.s. | 3 ± 2    | n.s. | 2 ± 1           | n.s. | 0.3 ± 0.4 | n.s. | 0 ± 0     | **   |
| 17 DAS                      | 8 ± 6     | 9 ± 4              | n.s. | 13 ± 7   | n.s. | 12 ± 4   | n.s. | 10 ± 6            | n.s. | 9 ± 3    | n.s. | 2 ± 2    | **   | 2 ± 1              | n.s. | 4 ± 4    | n.s. | 0.2 ± 0.3       | ***  | 0.3 ± 0.7 | ***  | 0 ± 0     | ***  |
| 24 DAS                      | 12 ± 5    | 10 ± 3             | n.s. | 29 ± 6   | ***  | 35 ± 14  | ***  | 11 ± 4            | n.s. | 8 ± 7    | n.s. | 3 ± 2    | ***  | 8 ± 4              | n.s. | 15 ± 9   | n.s. | 2 ± 1           | **   | 1 ± 1     | ***  | 0.2 ± 0.3 | ***  |

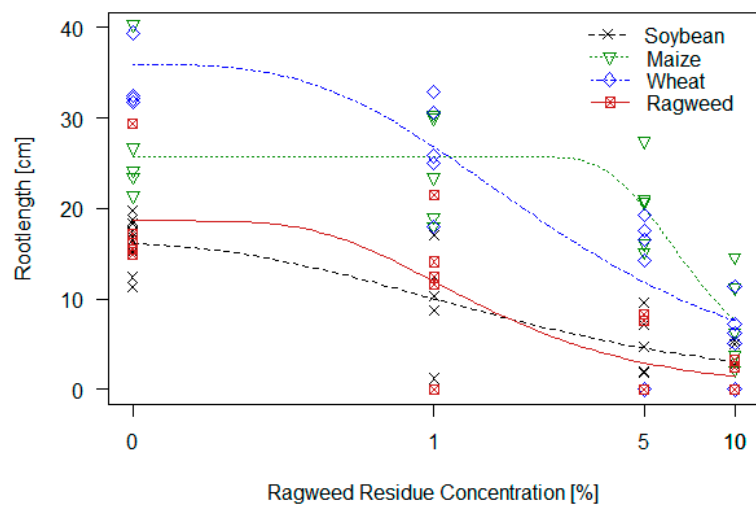

**Figure S1.** Reduction in root length (cm) of soybean, wheat, maize and ragweed after a 24-days exposure to ragweed residues; logistic regression on basis of most parsimonious model based on Weibull probability distribution,  $n = 10$ .
